# Supplementary material for: Evolution of genome diagnostics in epidermolysis bullosa: Unveiling the power of next‐generation sequencing
Source: PubMed Central journal article supplement — J Eur Acad Dermatol Venereol. 2024 Mar 11;39(1):154–60. doi: 10.1111/jdv.19938 (PMC11664470; doi:10.1111/jdv.19938), 2024-03-11
Supplement: JDV-39-154-s001.pdf [file JDV-39-154-s001.pdf]

## Supplementary Data

**Table S1 - NGS EB gene-panels at the Dutch EB Expertise Center.**

| Next-generation gene-panel epidermolysis bullosa |                                      |                                         |                                       |                          |                              |
|--------------------------------------------------|--------------------------------------|-----------------------------------------|---------------------------------------|--------------------------|------------------------------|
| Targeted panel sequencing                        |                                      | Whole-exome sequencing                  |                                       |                          |                              |
| 1 <sup>st</sup> version<br>March 2014            | 2 <sup>nd</sup> version<br>July 2014 | 1 <sup>st</sup> version<br>October 2017 | 2 <sup>nd</sup> version<br>March 2020 | Last version<br>May 2022 | Percentage<br>≥ 20x coverage |
| -                                                | -                                    | -                                       | ATP2A2                                | ATP2A2                   | 99.88                        |
| ATP2C1                                           | ATP2C1                               | ATP2C1                                  | ATP2C1                                | ATP2C1                   | 99.84                        |
| -                                                | -                                    | -                                       | CAST                                  | CAST                     | 97.31                        |
| CD151                                            | CD151                                | CD151                                   | CD151                                 | CD151                    | 99.45                        |
| CDSN                                             | CDSN                                 | CDSN                                    | CDSN                                  | CDSN                     | 99.94                        |
| -                                                | -                                    | -                                       | CHST8                                 | CHST8                    | 97.87                        |
| COL17A1                                          | COL17A1                              | COL17A1                                 | COL17A1                               | COL17A1                  | 99.17                        |
| COL7A1                                           | COL7A1                               | COL7A1                                  | COL7A1                                | COL7A1                   | 99.84                        |
| CSTA                                             | CSTA                                 | CSTA                                    | CSTA                                  | CSTA                     | 99.69                        |
| -                                                | -                                    | -                                       | -                                     | CSTB                     | 100                          |
| -                                                | -                                    | -                                       | DSC1                                  | DSC1                     | 99.92                        |
| -                                                | -                                    | -                                       | DSC3                                  | DSC3                     | 99.37                        |
| -                                                | -                                    | -                                       | DSG1                                  | DSG1                     | 97.62                        |
| -                                                | -                                    | -                                       | DSG3                                  | DSG3                     | 99.2                         |
| DSP                                              | DSP                                  | DSP                                     | DSP                                   | DSP                      | 100                          |
| DST                                              | DST                                  | DST                                     | DST                                   | DST                      | 98.9                         |
| EXPH5                                            | EXPH5                                | EXPH5                                   | EXPH5                                 | EXPH5                    | 99.7                         |
| GJB6                                             | GJB6                                 | GJB6                                    | -                                     | -                        | -                            |
| FERMT1                                           | FERMT1                               | FERMT1                                  | FERMT1                                | FERMT1                   | 99.65                        |
| -                                                | -                                    | -                                       | FLG2                                  | FLG2                     | 100                          |
| -                                                | -                                    | -                                       | IKBKG                                 | IKBKG                    | 19.89                        |
| ITGA3                                            | ITGA3                                | ITGA3                                   | ITGA3                                 | ITGA3                    | 99.66                        |
| ITGA6                                            | ITGA6                                | ITGA6                                   | ITGA6                                 | ITGA6                    | 99.99                        |
| ITGB4                                            | ITGB4                                | ITGB4                                   | ITGB4                                 | ITGB4                    | 97.31                        |
| JUP                                              | JUP                                  | JUP                                     | JUP                                   | JUP                      | 97.69                        |
| -                                                | KLHL24                               | -                                       | KLHL24                                | KLHL24                   | 100                          |
| KRT1                                             | KRT1                                 | KRT1                                    | KRT1                                  | KRT1                     | 100                          |
| KRT10                                            | KRT10                                | KRT10                                   | KRT10                                 | KRT10                    | 98.48                        |
| KRT14                                            | KRT14                                | KRT14                                   | KRT14                                 | KRT14                    | 99.55                        |
| KRT16                                            | KRT16                                | KRT16                                   | KRT16                                 | KRT16                    | 82.09                        |
| KRT17                                            | KRT17                                | KRT17                                   | KRT17                                 | KRT17                    | 94.16                        |
| -                                                | -                                    | -                                       | KRT2                                  | KRT2                     | 100                          |
| KRT5                                             | KRT5                                 | KRT5                                    | KRT5                                  | KRT5                     | 100                          |
| KRT6A                                            | KRT6A                                | KRT6A                                   | KRT6A                                 | KRT6A                    | 100                          |
| KRT6B                                            | KRT6B                                | KRT6B                                   | KRT6B                                 | KRT6B                    | 100                          |
| KRT6C                                            | KRT6C                                | KRT6C                                   | KRT6C                                 | KRT6C                    | 98.15                        |
| KRT9                                             | KRT9                                 | KRT9                                    | KRT9                                  | KRT9                     | 100                          |
| LAMA3                                            | LAMA3                                | LAMA3                                   | LAMA3                                 | LAMA3                    | 98.92                        |
| LAMB3                                            | LAMB3                                | LAMB3                                   | LAMB3                                 | LAMB3                    | 98.63                        |
| LAMC2                                            | LAMC2                                | LAMC2                                   | LAMC2                                 | LAMC2                    | 99.96                        |
| PKP1                                             | PKP1                                 | PKP1                                    | PKP1                                  | PKP1                     | 99.97                        |
| PLEC1                                            | PLEC1                                | PLEC1                                   | PLEC1                                 | PLEC1                    | 99.08                        |
| -                                                | -                                    | -                                       | SERPINB8                              | SERPINB8                 | 100                          |
| SPINK5                                           | SPINK5                               | SPINK5                                  | SPINK5                                | SPINK5                   | 98.11                        |
| TGM5                                             | TGM5                                 | TGM5                                    | TGM5                                  | TGM5                     | 99.87                        |

|               |               |               |             |             |       |
|---------------|---------------|---------------|-------------|-------------|-------|
| -             | -             | -             | <i>TP63</i> | <i>TP63</i> | 94.05 |
| <i>WNT10A</i> | <i>WNT10A</i> | <i>WNT10A</i> | -           | -           | -     |

Inclusion and coverage of genes as in the latest version (May 2022) of the WES EB gene-panel used in this study.

The contents of the NGS EB gene-panels are revisited twice annually and updated based on new genetic findings in the literature. EB, epidermolysis bullosa; NGS, next-generation sequencing; TPS, targeted panel sequencing; WES, whole-exome sequencing.

**Table S2 - Diagnostic yield and turnaround times for SS and NGS-based methods per EB subtype performed from 1994–2022.**

| EB type        | EB subtype* |                                | Total cases, <i>n</i> (%) |           |          | Diagnostic yield, <i>n</i> (%) |            |          |                      | Turnaround time, <i>days</i> (IQR) |            |         |
|----------------|-------------|--------------------------------|---------------------------|-----------|----------|--------------------------------|------------|----------|----------------------|------------------------------------|------------|---------|
|                |             |                                | Total                     | Solved    | Unsolved | SS                             | NGS<br>TPS | WES      | NGS# 2 <sup>nd</sup> | SS                                 | NGS<br>TPS | WES     |
| EBS            | Dominant    | Localized                      | 49 (39%)                  | 42 (86%)  | 7 (14%)  | 33 (85%)                       | -          | 9 (90%)  | -                    | 392 (565)                          | -          | 38 (8)  |
|                |             | Intermediate                   | 9 (7%)                    | 8 (89%)   | 1 (11%)  | 5 (71%)                        | 3 (100%)   | -        | -                    | 428 (570)                          | 74 (-)     | -       |
|                |             | Intermediate ( <i>PLEC1</i> )  | 6 (5%)                    | 6 (-)     | -        | 6 (100%)                       | -          | -        | -                    | 440 (-)                            | -          | -       |
|                |             | Intermediate ( <i>KLHL24</i> ) | 1 (1%)                    | 1 (-)     | -        | -                              | -          | -        | 1 (-)                | -                                  | -          | -       |
|                |             | Mottled pigmentation           | 7 (6%)                    | 7 (-)     | -        | 6 (100%)                       | -          | 1 (100%) | -                    | 179 (279)                          | -          | 17 (-)  |
|                | Severe      |                                | 23 (18%)                  | 23 (100%) | -        | 16 (94%)                       | 1 (100%)   | 5 (100%) | 1 (-)                | 251 (223)                          | 42 (-)     | 39 (-)  |
|                | Total DEBS  |                                | 95 (75%)                  | 87 (92%)  | 8 (8%)   | 66 (88%)                       | 4 (100%)   | 15 (94%) | 2 (-)                | 354 (357)                          | 60 (-)     | 38 (11) |
|                | Recessive   | Localized ( <i>DST</i> )       | 3 (2%)                    | 3 (-)     | -        | -                              | 1 (100%)   | 1 (100%) | 1 (-)                | -                                  | 94 (-)     | 12 (-)  |
|                |             | Intermediate ( <i>EXPH5</i> )  | 4 (3%)                    | 4 (100%)  | -        | -                              | -          | 2 (100%) | 2 (-)                | -                                  | -          | 40 (-)  |
|                |             | Intermediate ( <i>PLEC1</i> )  | 2 (2%)                    | 2 (-)     | -        | 2 (100%)                       | -          | -        | -                    | 1480 (-)                           | -          | -       |
|                |             | Intermediate ( <i>PLEC1a</i> ) | 1 (1%)                    | 1 (-)     | -        | 1 (100%)                       | -          | -        | -                    | 254 (-)                            | -          | -       |
|                |             | Intermediate/severe            | 4 (3%)                    | 4 (100%)  | -        | 4 (100%)                       | -          | -        | -                    | 167 (227)                          | -          | -       |
| Suprabasal EBS |             | 18 (14%)                       | 18 (100%)                 | -         | 11 (92%) | 2 (100%)                       | 3 (100%)   | 2 (-)    | 153 (152)            | 64 (-)                             | 37 (-)     |         |
| Total REBS     |             | 32 (25%)                       | 32 (100%)                 | -         | 19 (83%) | 3 (100%)                       | 6 (100%)   | 4 (-)    | 162 (238)            | 90 (-)                             | 36 (18)    |         |
| Total EBS      |             |                                | 127 (41.2%)               | 119 (94%) | 8 (6%)   | 85 (87%)                       | 7 (100%)   | 21 (95%) | 6 (-)                | 277 (380)                          | 74 (48)    | 37 (12) |
| JEB            | Dominant    | Localized                      | 1 (1%)                    | 1 (-)     | -        | 1 (100%)                       | -          | -        | -                    | 486 (-)                            | -          | -       |
|                | Recessive   | Localized                      | 15 (22%)                  | 12 (80%)  | 3 (18%)  | 10 (67%)                       | -          | -        | 2 (-)                | 269 (757)                          | -          | -       |
|                |             | Intermediate                   | 25 (36%)                  | 25 (100%) | -        | 19 (100%)                      | 3 (100%)   | 3 (100%) | -                    | 277 (634)                          | 53 (-)     | 34 (-)  |
|                |             | Severe                         | 25 (36%)                  | 25 (100%) | -        | 19 (100%)                      | 3 (100%)   | 3 (100%) | -                    | 149 (314)                          | 28 (-)     | 34 (-)  |
|                |             | Pyloric atresia                | 3 (4%)                    | 2 (67%)   | 1 (33%)  | 2 (67%)                        | -          | -        | -                    | 72 (-)                             | -          | -       |
| Total JEB      |             |                                | 69 (22.4%)                | 65 (94%)  | 4 (6%)   | 51 (89%)                       | 6 (100%)   | 6 (100%) | 2 (-)                | 214 (495)                          | 39 (28)    | 34 (23) |
| DEB            | Dominant    | Localized                      | 26 (24%)                  | 24 (92%)  | 2 (8%)   | 20 (100%)                      | -          | 4 (67%)  | -                    | 128 (325)                          | -          | 30 (16) |
|                |             | Intermediate                   | 17 (16%)                  | 16 (94%)  | 1 (6%)   | 12 (92%)                       | 2 (100%)   | 2 (100%) | -                    | 70 (302)                           | 84 (-)     | 34 (-)  |
|                |             | Pruriginosa                    | 6 (6%)                    | 6 (-)     | -        | 5 (100%)                       | 1 (100%)   | -        | -                    | 66 (216)                           | 37         | -       |
|                |             | Self-improving                 | 1 (1%)                    | 1 (-)     | -        | -                              | -          | 1 (100%) | -                    | -                                  | -          | 24 (-)  |
|                |             | Unknown                        | 3 (3%)                    | 3 (-)     | -        | -                              | 1 (100%)   | 2 (100%) | -                    | -                                  | 45         | 23 (-)  |
|                | Total DDEB  |                                | 53 (49%)                  | 50 (94%)  | 3 (6%)   | 37 (97%)                       | 4 (100%)   | 9 (82%)  | -                    | 90 (292)                           | 47 (62)    | 25 (14) |
|                | Recessive   | Localized                      | 6 (6%)                    | 6 (-)     | -        | 2 (50%)                        | -          | 2 (100%) | 2 (-)                | 193 (-)                            | -          | 119 (-) |
|                |             | Intermediate                   | 16 (15%)                  | 15 (94%)  | 1 (6%)   | 12 (100%)                      | 1 (100%)   | 2 (67%)  | -                    | 67 (158)                           | 56         | 34 (-)  |
| Inversa        |             | 8 (7%)                         | 8 (100%)                  | -         | 7 (100%) | 1 (100%)                       | -          | -        | 1004 (1277)          | 52 (-)                             | -          |         |

|           |            |             |           |         |           |           |          |          |           |         |         |
|-----------|------------|-------------|-----------|---------|-----------|-----------|----------|----------|-----------|---------|---------|
|           | Severe     | 24 (22%)    | 22 (92%)  | 2 (8%)  | 19 (90%)  | -         | 3 (100%) | -        | 302 (917) | -       | 42 (-)  |
|           | Unknown    | 2 (2%)      | 2 (-)     | -       | 1 (100%)  | 1 (100%)  | -        | -        | 113 (-)   | 128 (-) | -       |
|           | Total RDEB | 56 (51%)    | 53 (95%)  | 3 (5%)  | 41 (91%)  | 3 (100%)  | 7 (88%)  | 2 (-)    | 202 (941) | 56 (-)  | 42 (17) |
| Total DEB |            | 109 (35.4%) | 103 (94%) | 6 (6%)  | 78 (94%)  | 7 (100%)  | 16 (84%) | 2 (-)    | 128 (668) | 52 (73) | 30 (18) |
| Total KEB |            | 3 (1.0%)    | 2 (67%)   | 1 (33%) | 0 (0%)    | -         | 1 (100%) | 1 (-)    | -         | -       | 46 (-)  |
| Total EB  |            | 308         | 289 (94%) | 19 (6%) | 214 (89%) | 20 (100%) | 44 (92%) | 11 (50%) | 211 (464) | 53 (46) | 36 (16) |

\* EB-types are considered as four major EB-types: EB simplex (EBS), junctional EB (JEB), dystrophic EB (DEB) and Kindler EB (KEB). EB-subtypes are divided in dominant (D) and recessive (R), distinguished between different EBS-intermediate subtypes, both dominant and recessive, according to the latest consensus paper.<sup>1</sup> We included suprabasal EBS-subtypes as these phenotypes were part of the EB classification until 2020 (they are currently classified among the EB-related skin fragility disorders).<sup>15</sup> # EB-cases with pathogenic variant(s) detected via NGS, either TPS or WES, after SS failed to do so. Excluded in the calculation of the diagnostic yield for NGS (only numbers displayed). DEB, dystrophic epidermolysis bullosa; EB, epidermolysis bullosa; EBS, epidermolysis bullosa simplex; IQR, interquartile range; JEB, junctional epidermolysis bullosa; KEB, Kindler epidermolysis bullosa; NGS, next-generation sequencing; IQR, interquartile range; SS, Sanger sequencing; TPS, targeted panel sequencing; WES, whole-exome sequencing.

**Table S3 - Distribution and type of additional sequence variants found with SS and NGS in EB patients from 1994–2022.**

|                                                           | <b>Total, n (%)</b> | <b>SS*, n (%)</b> | <b>NGS#, n (%)</b> |
|-----------------------------------------------------------|---------------------|-------------------|--------------------|
| <b>Total EB-cases, n (%)</b>                              | 308 (-)             | 240 (-)           | 90 (-)             |
| <b>VUS, n (%)</b>                                         | <b>33 (-)</b>       | <b>13 (5%)</b>    | <b>20 (22%)</b>    |
| <b>Solved EB-cases, n (%)</b>                             | 28 (85%)            | 12 (82%)          | 16 (80%)           |
| Candidate EB-gene                                         | 13                  | 9                 | 4                  |
| Other EB-gene                                             | 10                  | 3                 | 7                  |
| EB-related gene                                           | 3                   | -                 | 3                  |
| EB and EB-related gene                                    | 2                   | -                 | 2                  |
| <b>Unsolved EB-cases, n (%)</b>                           | 5 (15%)             | 1 (8%)            | 4 (20%)            |
| Candidate EB-gene                                         | 2                   | 1                 | 1                  |
| Other EB-gene                                             | 1                   | -                 | 1                  |
| EB-related gene                                           | 1                   | -                 | 1                  |
| EB and EB-related gene                                    | 1                   | -                 | 1                  |
| <b>AF, n (%)</b>                                          | <b>15 (-)</b>       | <b>3 (1%)</b>     | <b>12 (13%)</b>    |
| <b>Solved EB-cases, n (%)</b>                             | 13 (87%)            | 3 (100%)          | 10 (83%)           |
| Candidate EB-gene ( <i>LAMA3</i> )                        | 1                   | -                 | 1                  |
| Other EB-gene ( <i>PLEC1</i> )                            | 5                   | 2                 | 3                  |
| EB-related gene ( <i>CAST, KRT6A, WNT10A</i> )            | 6                   | -                 | 6                  |
| EB ( <i>LAMB3</i> ) and EB-related gene ( <i>WNT10A</i> ) | 1                   | 1                 | -                  |
| <b>Unsolved EB-cases, n (%)</b>                           | 2 (13%)             | -                 | 2 (17%)            |
| Candidate EB-gene                                         | -                   | -                 | -                  |
| Other EB-gene ( <i>DST</i> )                              | 1                   | -                 | 1                  |
| EB-related gene ( <i>WNT10A</i> )                         | 1                   | -                 | 1                  |

\* Number of EB-cases in whom SS was performed as initial diagnostic tier. # Total EB-cases in whom NGS was performed (including EB-cases in whom SS was performed first). AF, additional finding(s); VUS, variant of uncertain clinical significance.



Figure S2

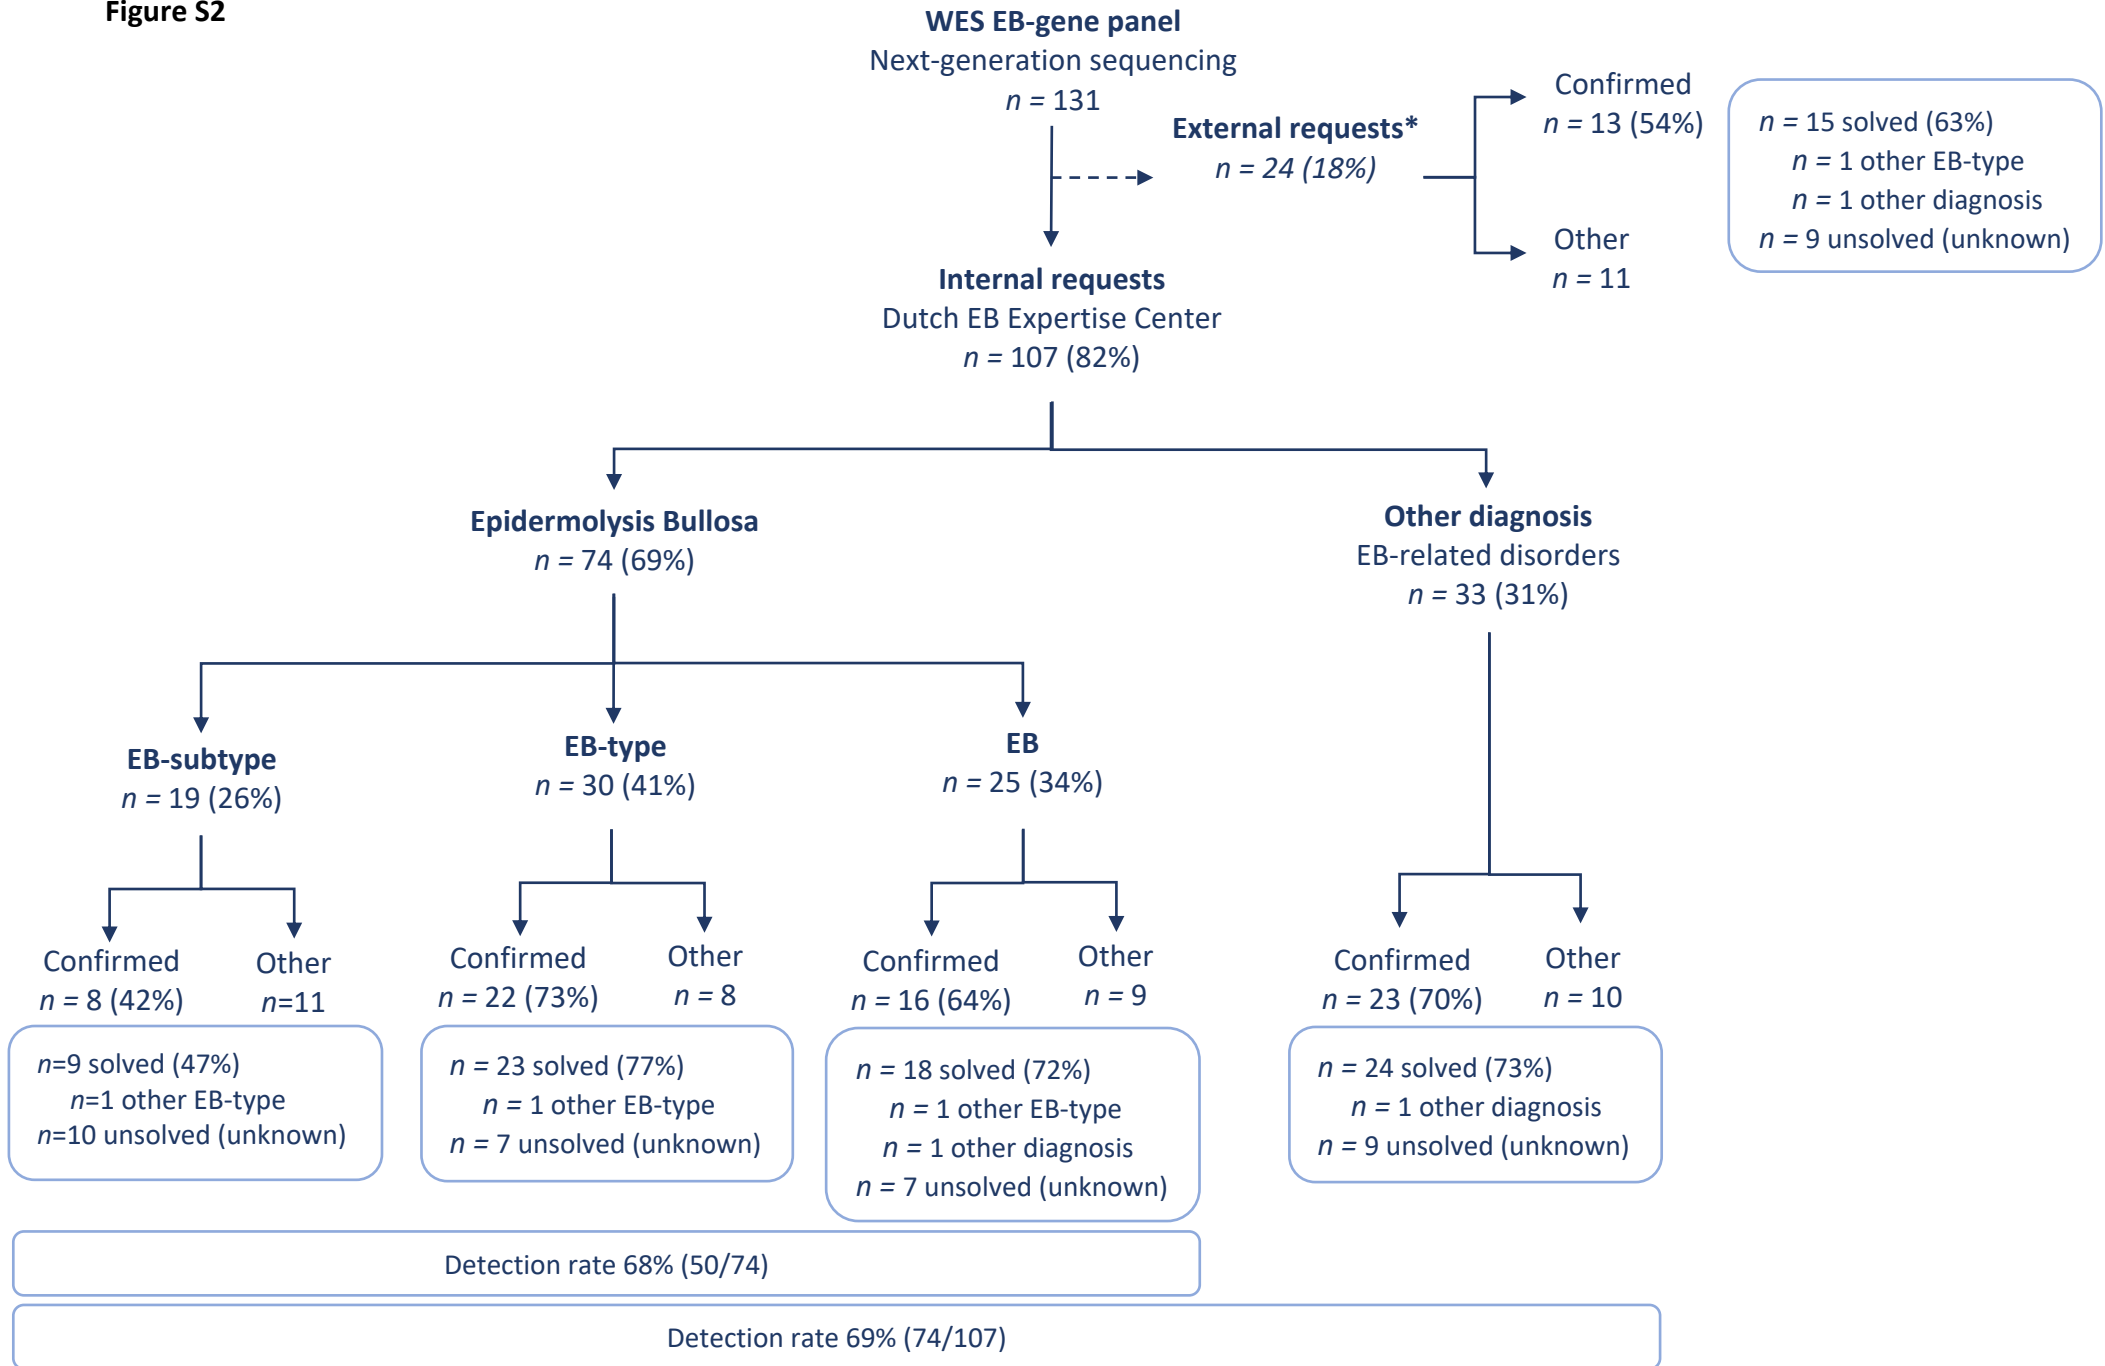

**Figure S2 – Detection rate of the WES EB-gene panel from the perspective of the Genome Diagnostics laboratory.** Flowchart showing requests received by the Genome Diagnostics laboratory for EB gene-panel WES diagnostics from its implementation in May 2017 until January 2022 ( $n = 131$ ). In total, 74 internal requests were received from specialists of the Dutch EB Expertise Center because of clinical suspicion of EB. Another 33 internal requests were received for EB-related disorders. We analyzed the mutation detection rate per request reason. ‘EB’ indicates broad clinical suspicion of a type of EB. ‘EB-type’ indicates clinical suspicion of one of the four major EB-types. ‘EB-subtype’ indicates clinical suspicion of a specific EB-subtype. ‘Other diagnosis’ indicates clinical suspicion of an EB-related disorder for which genes are included in the WES EB gene-panel. The overall mutation detection rate was 68% (69% when including requests for EB-related disorders), and the diagnostic accuracy 93%. Interestingly, the mutation detection rate was lowest for the very specific request reason ‘EB-subtype’, which otherwise implies the highest clinical confidence of a diagnosis of EB. \* One EB-case was referred to the Dutch EB Center for further phenotyping and specialized medical care after a positive DNA result. This EB-case is considered external from the Genome Diagnostics laboratory’s perspective, but it was included in the 308 EB-cases with a certain clinical diagnosis of EB throughout the rest of the paper. EB, epidermolysis bullosa; WES, whole-exome sequencing.
